# Supplementary material for: Expression Mapping and Functional Analysis of Orphan G-Protein-Coupled Receptor GPR158 in the Adult Mouse Brain Using a GPR158 Transgenic Mouse
Source: MDPI journal article supplement (doi:10.3390/biom13030479), 2023-03-05
Supplement: s1 [file s1]

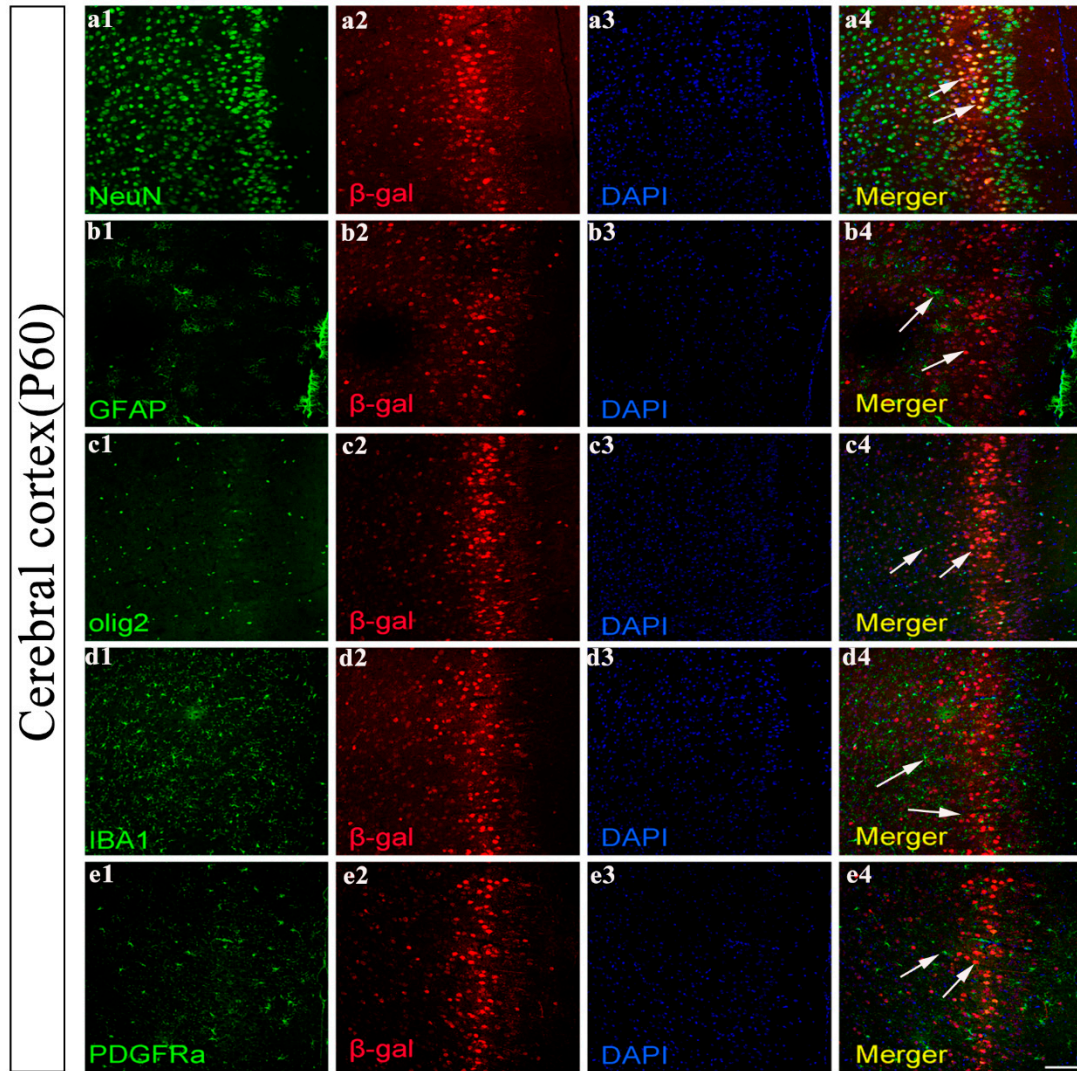

**Figure S1. Expression of GPR158 in neurons of the cerebral cortex of GPR158 knockout mice at P60.**

A GPR158 (red, a2) was expressed in neurons (green, a1) in the cerebral cortex of GPR158 knockout mice at P60. Neurons (green) were stained with NeuN.

B GPR158-positive cells were not detected in activated astrocytes (green) of the cerebral cortex. Activated astrocytes (green) were stained with GFAP.

C Immunofluorescence stainings on cerebral cortex showed GPR158 (red) was not expressed in oligodendrocytes. Oligodendrocytes (green) were stained with olig2.

D Immunofluorescence stainings on cerebral cortex showed GPR158 (red) was not expressed in microglia. Microglia (green) were stained with IBA1.

E GPR158 was not expressed in oligodendrocyte precursor cells (green, e1). Oligodendrocyte precursor cells (green) were stained with PDGFRa. GPR158 expression site (red) were stained with  $\beta$ -gal. Nuclei (blue) were stained with DAPI. Scale bars, 30  $\mu$ m.
