# Supplementary material for: Expression Mapping and Functional Analysis of Orphan G-Protein-Coupled Receptor GPR158 in the Adult Mouse Brain Using a GPR158 Transgenic Mouse
Source: MDPI journal article supplement (doi:10.3390/biom13030479), 2023-03-05
Supplement: s1 [file s1]

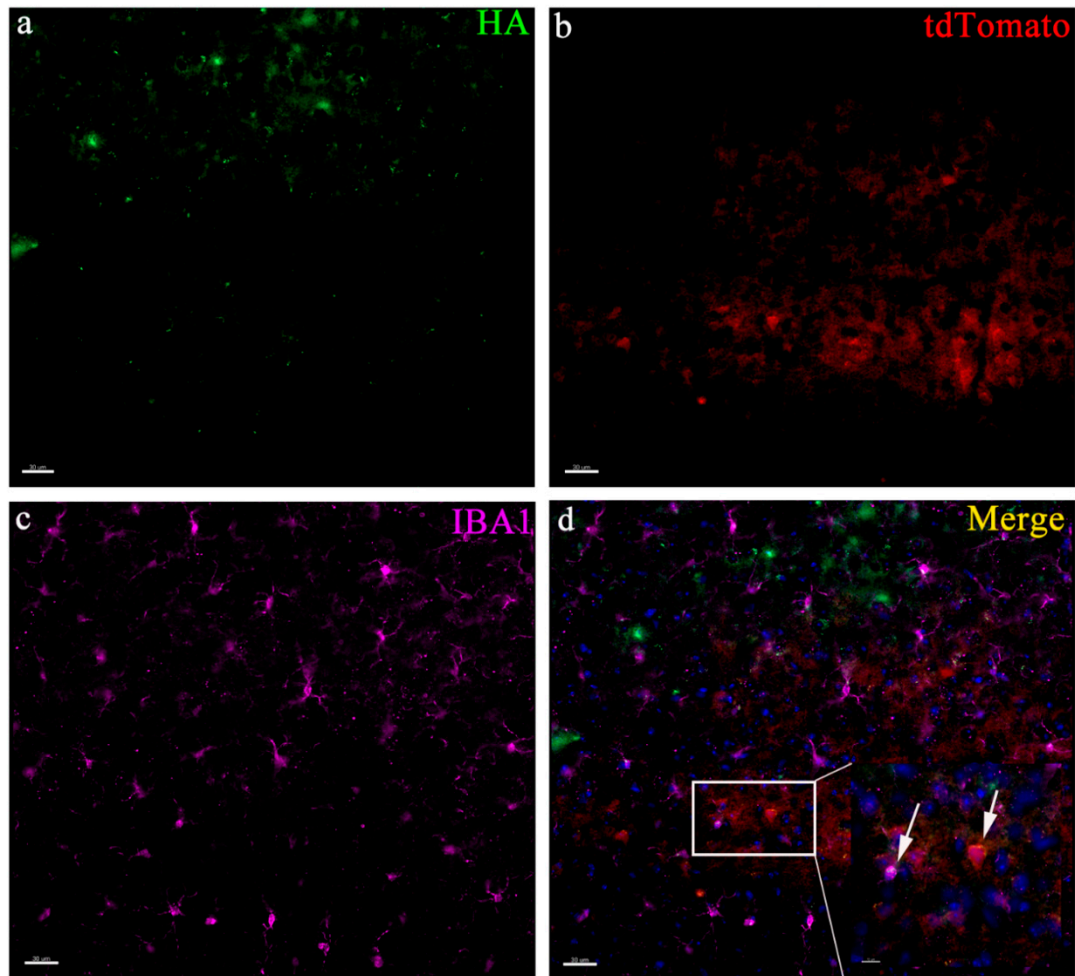

**Figure S3. Microglia were not co-stained with tdTomato<sup>+</sup> cells, but HA-tagged GPR158 molecules were detected in microglia in the cerebral cortex of GPR 158<sup>Tag</sup> mice at P60.**

A Immunofluorescence staining showing punctate signals of HA-tagged GPR158 molecules in the cerebral cortex of GPR158<sup>Tag</sup> mice

B Immunofluorescence staining showing positive cells expressing GPR158 labelled by tdTomato in the cerebral cortex of GPR158<sup>Tag</sup> mice

C Immunofluorescence staining showing microglia labelled by Iba1 antibody in the cerebral cortex of GPR158<sup>Tag</sup> mice

D Immunofluorescence staining merge diagram and its local magnification. GPR158(red) was stained with mCherry. Nuclei (blue) were stained with DAPI. Scale bars 30  $\mu$ m.
